# Supplementary material for: Time Trends in Atrial Fibrillation-Associated Stroke and Premorbid Anticoagulation: Population-Based Study and Systematic Review
Source: PubMed Central journal article supplement (PMC6314508; doi:10.1161/strokeaha.118.022249), 2018-11-29
Supplement: str-50-21-s001.pdf [file str-50-21-s001.pdf]

## SUPPLEMENTAL MATERIAL

### TIME-TRENDS IN AF-ASSOCIATED STROKE AND PREMORBID ANTICOAGULATION: POPULATION-BASED STUDY AND SYSTEMATIC REVIEW

Gabriel SC Yiin DPhil, Linxin Li DPhil, Yannick Bejot PhD, Peter M. Rothwell FMedSci

| Table | title                                                                                                                                                                                     | Page |
|-------|-------------------------------------------------------------------------------------------------------------------------------------------------------------------------------------------|------|
| I     | Search terms                                                                                                                                                                              | 2    |
| IIa   | Characteristics of population-based studies reporting proportion of incident stroke associated with prior AF                                                                              | 3    |
| IIb   | Characteristics of population-based studies reporting proportion of incident stroke or incident ischaemic stroke associated with total AF (prior and new)                                 | 6    |
| III   | Linear regression determining the degree of heterogeneity attributed to age of stroke population, study period, study country, and ethnicity against AF rate in incident stroke           | 7    |
| IV    | Linear regression determining the degree of heterogeneity attributed to age of stroke population, study period, study country, and ethnicity against AF rate in incident ischaemic stroke | 8    |

| Figure | title                                                                                      | Page |
|--------|--------------------------------------------------------------------------------------------|------|
| I      | Projected number of adults individuals with AF in US by 2050 and European Union by 2060    | 9    |
| II     | Flow chart showing selection of studies for systematic review                              | 10   |
| III    | Funnel plot of 44 AF rates from 33 reports                                                 | 11   |
| IVa-c  | Forest plot of premorbid AF rates in European and non-European studies                     | 12   |
| V      | Premorbid AF prevalence in population-based studies of incident ischaemic stroke           | 14   |
| VI     | Forest plot of premorbid AF rates in studies with incident ischaemic stroke as denominator | 15   |

**Table I. Search terms for systematic review and the number of abstracts identified from the 3 databases**

| Search terms                                    | Abstracts   |               |             |
|-------------------------------------------------|-------------|---------------|-------------|
|                                                 | Pubmed      | Embase        | Cochrane    |
| Population based stroke incidence studies       | 1986        | 5835          | 32          |
| Population based study AND stroke               | 582         | 14715         | 13          |
| Stroke and incidence study                      | 72          | 36364         | 773         |
| TOAST and population based study                | 5           | 974           | 0           |
| TOAST                                           | 395         | 7152          | 48          |
| AF stroke AND population based study            | 66          | 22664         | 0           |
| AF AND rates                                    | 1887        | 12931         | 211         |
| Atrial flutter and incidence study              | 0           | 36948         | 1           |
| Atrial flutter and population based study       | 5           | 24205         | 0           |
| AF AND stroke incidence                         | 65          | 5698          | 5           |
| AF rate AND stroke incidence                    | 0           | 5496          | 1           |
| AF rate and population based study              | 0           | 10905         | 132         |
| Population based study AND stroke incidence     | 43          | 5487          | 2           |
| A-S-C-O                                         | 3           | 518           | 0           |
| Cardioembolic stroke AND population based study | 487         | 1928          | 25          |
| <b>Total</b>                                    | <b>5596</b> | <b>191820</b> | <b>1243</b> |

**Table IIa. Characteristics of population-based studies reporting proportion of incident stroke associated with known prior AF**

| Region                                                 | Period    | Duration (yrs) | Popn   | Person-yrs | Ethnicity | Total events | Mean age (SD) | AF rate (%)     | OAC rate (%)  | AF defn | ECG rate (%) |
|--------------------------------------------------------|-----------|----------------|--------|------------|-----------|--------------|---------------|-----------------|---------------|---------|--------------|
| Tartu, Estonia <sup>1</sup>                            | 1991-1993 | 3              | 110631 | 331893     | W         | 829          | 69.5 (13.8)   | 205/829 (24.7)  | NR            | No      | NR           |
| Tartu, Estonia <sup>2</sup>                            | 2001-2003 | 3              | 101122 | 303366     | W         | 451          | 71.6 (12.3)   | 135/451 (29.9)  | NR            | No      | NR           |
| Novosibirsk, Russian <sup>3</sup>                      | 1992-1993 | 1              | 158234 | 158234     | W         | 366          | 64.8 (13.1)   | 57/366 (15.6)   | NR            | No      | NR           |
| Kaunas, Lithuania <sup>4</sup>                         | 2004-2005 | 1              | 365191 | 365191     | W         | 803          | 69.9 (12.8)   | 204/803 (25.4)  | NR            | No      | NR           |
| Menorca, Spain <sup>4</sup>                            | 2004-2006 | 2              | 75135  | 150270     | W         | 76           | 72.2 (14.1)   | 10/76 (13.2)    | NR            | No      | NR           |
| Warsaw, Poland <sup>4</sup>                            | 2005      | 1              | 120186 | 120186     | W         | 132          | 69 (13.9)     | 33/132 (25)     | NR            | No      | NR           |
| Grodno, Belarus <sup>5</sup>                           | 2001-2003 | 3              | 311134 | 933402     | W         | 2069         | 65.8 (11.6)   | 478/2069 (23.1) | NR            | No      | NR           |
| Dijon, France* <sup>6</sup>                            | 1985-1991 | 7              | 145396 | 1017772    | W         | 890          | NR            | 143/890 (16.1)  | 9/143 (6.3)   | No      | NR           |
| Dijon, France* <sup>6</sup>                            | 1992-1999 | 8              | 149759 | 1198072    | W         | 1133         | NR            | 171/1133 (15.1) | 25/171 (14.6) | No      | NR           |
| Dijon, France* <sup>6</sup>                            | 2000-2006 | 7              | 152415 | 1066905    | W         | 1046         | NR            | 139/1046 (13.3) | 30/139 (21.6) | No      | NR           |
| Martinique, French West Indies (ERMANICA) <sup>7</sup> | 1998-1999 | 1              | 381364 | 381364     | BC        | 463          | 71.2 (14.0)   | 70/463 (15.1)   | NR            | No      | NR           |
| Martinique, French West Indies (ERMANICA) <sup>8</sup> | 2003-2004 | 1              | 381364 | 381364     | BC        | 240          | 73 (11.0)     | 28/240 (11.7)   | NR            | No      | NR           |
| Barbados <sup>9</sup>                                  | 2001-2005 | 3.5            | 268762 | 940667     | BC        | 968          | 70.8 (15.7)   | 65/968 (6.7)    | 19/64 (29.7)  | No      | NR           |
| Malmo, Sweden <sup>10</sup>                            | 1989-1990 | 1              | 232448 | 232448     | W         | 524          | 74.8 (NR)     | 100/524 (19.1)  | NR            | No      | NR           |
| Valley of Aosta, Italy* <sup>11</sup>                  | 1989      | 1              | 123748 | 123748     | W         | 170          | 72.6 (NR)     | 31/170 (18.2)   | 0/31 (0)      | No      | NR           |

|                                       |           |    |        |         |    |      |             |                 |                |     |      |
|---------------------------------------|-----------|----|--------|---------|----|------|-------------|-----------------|----------------|-----|------|
| Valley of Aosta, Italy* <sup>12</sup> | 2004-2008 | 5  | 125366 | 626830  | W  | 1057 | 75.7 (12.7) | 235/1057 (22.2) | 76/235 (32.3)  | N   | 99%  |
| Belluno, Italy* <sup>13</sup>         | 1992-1993 | 1  | 211389 | 211389  | W  | 319  | NR          | 77/319 (24.1)   | 8/77 (10.4)    | No  | NR   |
| Sesto Fiorentino, Italy <sup>4</sup>  | 2004-2006 | 2  | 47326  | 94652   | W  | 161  | 75.9 (11.9) | 30/161 (18.6)   | NR             | No  | NR   |
| Aeolian Island, Italy <sup>14</sup>   | 1999-2002 | 3  | 13431  | 40293   | W  | 62   | 72.5 (9.9)  | 7/62 (11.3)     | NR             | No  | NR   |
| Arcardia, Greece <sup>15</sup>        | 1993-1995 | 2  | 80774  | 161548  | W  | 555  | 75.4 (NR)   | 189/555 (34.1)  | NR             | No  | NR   |
| South London, UK <sup>16</sup>        | 1995-1998 | 4  | 234533 | 938132  | MR | 1305 | NR          | 252/1223 (20.6) | 30/245 (12.2)  | No  | NR   |
| South London, UK <sup>16</sup>        | 1999-2002 | 4  | 310028 | 1240112 | MR | 1074 | NR          | 138/992 (13.9)  | 21/124 (16.9)  | No  | NR   |
| South London, UK <sup>16</sup>        | 2003-2006 | 4  | 310028 | 1240112 | MR | 994  | NR          | 148/967 (15.3)  | 30/147 (20.4)  | No  | NR   |
| South London, UK <sup>16</sup>        | 2007-2010 | 4  | 357308 | 1429232 | MR | 877  | NR          | 127/852 (14.9)  | 29/125 (23.2)  | No  | NR   |
| Oxfordshire, UK* <sup>17</sup>        | 1981-1984 | 4  | 86517  | 346068  | W  | 474  | 77.5 (8.8)  | 56/474 (11.8)   | 5/56 (8.9)     | Yes | 95.3 |
| Oxfordshire, UK*                      | 2002-2017 | 15 | 92728  | 1390920 | W  | 1928 | 74.5 (13.5) | 425/1928 (22.0) | 102/425 (24.0) | Yes | 97.8 |
| Joinville, Brazil* <sup>18</sup>      | 2005-2006 | 2  | 487047 | 974094  | H  | 610  | 66 (13.5)   | 66/610 (10.8)   | 22/66 (33.3)   | No  | NR   |
| Joinville, Brazil* <sup>18</sup>      | 2012-2013 | 2  | 516288 | 1032576 | H  | 786  | 64 (15)     | 109/786 (13.9)  | NR             | No  | NR   |
| Iquique, Chile* <sup>19</sup>         | 2000-2002 | 2  | 214526 | 429052  | H  | 186  | 66.5 (14.9) | 23/186 (12.4)   | 12/23 (52.2)   | No  | 76   |
| Rochester, USA* <sup>20,21</sup>      | 1960-1969 | 10 | NR     | NR      | W  | 518  | 70.4 (NR)   | 57/518 (11.0)   | NR             | No  | NR   |
| Rochester, USA* <sup>20</sup>         | 1970-1979 | 10 | 52534  | 525340  | W  | 547  | 71.0 (NR)   | 93/547 (17.0)   | NR             | No  | NR   |

|                                           |           |    |         |         |     |      |             |                 |               |     |      |
|-------------------------------------------|-----------|----|---------|---------|-----|------|-------------|-----------------|---------------|-----|------|
| Rochester, USA* <sup>20,21</sup>          | 1980-1989 | 10 | 66596   | 665960  | W   | 805  | 73.5 (NR)   | 177/805 (22.0)  | NR            | No  | NR   |
| Greater Cincinnati, USA* <sup>22,23</sup> | 1993-1994 | 1  | 1299901 | 1299901 | B&W | 1956 | 71.2 (13.5) | 263/1956 (13.4) | NR            | No  | NR   |
| North Manhattan, USA* <sup>24</sup>       | 1993-1997 | 4  | 210000  | 840000  | MR  | 695  | 70.5 (14.0) | 132/695 (19.0)  | NR            | No  | NR   |
| Auckland, New Zealand <sup>25</sup>       | 2002-2003 | 1  | 897882  | 897882  | MR  | 1401 | 71.8 (14.3) | 289/1401 (20.6) | 71/289 (24.6) | No  | 98   |
| Auckland, New Zealand <sup>25</sup>       | 2011-12   | 1  | 1119192 | 1119192 | MR  | 1329 | 71.1 (15.2) | 389/1329 (29.3) | NR            | NR  | NR   |
| Ludwigshafen, Germany* <sup>26,27</sup>   | 2006-2007 | 2  | 167906  | 335812  | W   | 626  | 71.7 (13.2) | 121/626 (19.3)  | 42/121 (34.7) | Yes | 100  |
| Varaždin, Croatia* <sup>28</sup>          | 2007-2009 | 2  | 184115  | 368230  | W   | 748  | 72.8 (11.0) | 126/748 (16.8)  | 8/126 (6.3)   | No  | 99.4 |
| Porto, Portugal <sup>29</sup>             | 1998-2000 | 2  | 123112  | 246224  | W   | 462  | 72 (NR)     | 64/462 (13.9)   | 9/64 (14.1)   | NR  | NR   |
| Porto, Portugal <sup>29</sup>             | 2009-2011 | 2  | 204444  | 408888  | W   | 405  | 78 (NR)     | 75/405 (18.5)   | 34/75 (45.3)  | NR  | NR   |
| Iceland* <sup>30</sup>                    | 2007-2008 | 1  | 319355  | 319355  | W   | 343  | 72 (NR)     | 50/279 (17.9)   | NR            | NR  | NR   |

---

\*Incident ischaemic stroke; Popn=population; W=White; BC=Black Caribbean; H=Hispanics, MR=multiracial, B=black; Defn=definition; OAC=oral anticoagulation; NR=not recorded.

**Table IIb. Characteristics of population-based studies reporting proportion of incident stroke or incident ischaemic stroke associated with total AF (prior and new)**

| Region                                  | Period  | Duration (yrs) | Popn   | Person-yrs | Ethnicity | Total events | Mean age (SD) | AF rate (%)     | OAC rate (%)   | AF defn | ECG rate(%) |
|-----------------------------------------|---------|----------------|--------|------------|-----------|--------------|---------------|-----------------|----------------|---------|-------------|
| Oxfordshire, UK <sup>*17</sup>          | 1981-6  | 4              | 86517  | 346068     | W         | 474          | 77.3 (9.0)    | 85/474 (17.9)   | 3/56 (5.4)     | Yes     | 95.3        |
| Dijon, France <sup>*6</sup>             | 1985-91 | 7              | 145396 | 1017772    | W         | 890          | NR            | 196/890 (22)    | 9/143 (6.3)    | Yes     | NR          |
| L'Aquila, Italy <sup>*31</sup>          | 1994-8  | 5              | 297838 | 1489190    | W         | 3594         | 78.8 (13.3)   | 869/3530 (24.6) | NR             | Yes     | 91.2        |
| Dijon, France <sup>*6</sup>             | 1992-9  | 8              | 149759 | 1198072    | W         | 1133         | NR            | 198/1133 (17.5) | 25/171 (14.6)  | Yes     | NR          |
| Dijon, France <sup>*6</sup>             | 2000-6  | 7              | 152415 | 1066905    | W         | 1046         | NR            | 178/1046 (17)   | 30/139 (21.6)  | Yes     | NR          |
| North Dublin, UK <sup>32,33</sup>       | 2005-6  | 1              | 294529 | 294529     | W         | 485          | 70.2 (14.1)   | 126/403 (31.1)  | NR             | Yes     | 91.6        |
| Ludwigshafen, Germany <sup>*26,27</sup> | 2006-7  | 2              | 167906 | 335812     | W         | 626          | 78 (10)       | 187/626 (29.9)  | 42/121 (34.7)  | Yes     | 100         |
| Udine Italy <sup>34</sup>               | 2007-9  | 2              | 153312 | 306642     | W         | 640          | 76.2 (13.8)   | 208/640 (32.5)  | NR             | Yes     | NR          |
| Iceland <sup>*30</sup>                  | 2007-8  | 1              | 319355 | 319355     | W         | 279          | 72 (NR)       | 87/279 (31.2)   | NR             | NR      | NR          |
| Oxfordshire, UK <sup>*</sup>            | 2002-17 | 15             | 92728  | 1390920    | W         | 1928         | 74.5 (13.5)   | 629/1928 (32.6) | 102/425 (24.0) | Yes     | 97.8        |

\*Incident ischaemic stroke; Popn=population; W=White; BC=Black Caribbean; H=Hispanics, MR=multiracial, B=black; Defn=definition; NR=not recorded

**Table III. Inverse variance linear regression determining the degree of heterogeneity attributed to age of stroke population, study period, study country and ethnicity against AF rate in incident stroke.**

**Model Summary**

| Model | R                 | R Square | Adjusted R Square | Std. Error of the Estimate | Change Statistics |          |     |     |               |
|-------|-------------------|----------|-------------------|----------------------------|-------------------|----------|-----|-----|---------------|
|       |                   |          |                   |                            | R Square Change   | F Change | df1 | df2 | Sig. F Change |
| 1     | .785 <sup>a</sup> | .616     | .463              | 317.21149                  | .616              | 4.016    | 10  | 25  | .002          |

a. Predictors: (Constant), Multiracial, 2006-17, OtherCountries, Age70, 1995-99, 1960-89, 1990-94, Black, NAmerica, White

**Coefficients<sup>a,b</sup>**

| Model |                | Unstandardized Coefficients |            | Standardized Coefficients | t      | Sig. | 95.0% Confidence Interval for B |             |
|-------|----------------|-----------------------------|------------|---------------------------|--------|------|---------------------------------|-------------|
|       |                | B                           | Std. Error | Beta                      |        |      | Lower Bound                     | Upper Bound |
| 1     | (Constant)     | 2.618                       | 5.116      |                           | .512   | .613 | -7.919                          | 13.155      |
|       | 1960-89        | -3.577                      | 3.331      | -.197                     | -1.074 | .293 | -10.437                         | 3.284       |
|       | 1990-94        | .782                        | 3.090      | .046                      | .253   | .802 | -5.582                          | 7.146       |
|       | 1995-99        | 2.539                       | 3.003      | .141                      | .845   | .406 | -3.646                          | 8.723       |
|       | 2006-17        | .661                        | 2.225      | .047                      | .297   | .769 | -3.922                          | 5.244       |
|       | Age70          | -2.100                      | 2.466      | -.151                     | -.852  | .403 | -7.178                          | 2.979       |
|       | NAmerica       | -.677                       | 3.156      | -.044                     | -.215  | .832 | -7.177                          | 5.823       |
|       | OtherCountries | 9.458                       | 4.052      | .705                      | 2.334  | .028 | 1.113                           | 17.803      |
|       | White          | 19.448                      | 5.481      | 1.605                     | 3.548  | .002 | 8.159                           | 30.738      |
|       | Black          | -1.733                      | 4.361      | -.093                     | -.398  | .694 | -10.714                         | 7.248       |
|       | Multiracial    | 14.073                      | 4.446      | 1.046                     | 3.166  | .004 | 4.917                           | 23.229      |

a. Dependent Variable: AFrate\_percentage

b. Weighted Least Squares Regression - Weighted by invariance

**Table IV. Inverse variance linear regression determining the degree of heterogeneity attributed to age of stroke population, study period, study country and ethnicity against AF rate in incident ischaemic stroke.**

**Model Summary**

| Model | R                 | R Square | Adjusted R Square | Std. Error of the Estimate | Change Statistics |          |     |     |               |
|-------|-------------------|----------|-------------------|----------------------------|-------------------|----------|-----|-----|---------------|
|       |                   |          |                   |                            | R Square Change   | F Change | df1 | df2 | Sig. F Change |
| 1     | .841 <sup>a</sup> | .707     | .373              | 250.55570                  | .707              | 2.113    | 8   | 7   | .170          |

a. Predictors: (Constant), Multiracial, 1995-99, Age70, 2006-17, Black, 2000-05, Europe, 1990-94

**Coefficients<sup>a,b</sup>**

| Model |             | Unstandardized Coefficients |            | Standardized Coefficients | t      | Sig. | 95.0% Confidence Interval for B |             |
|-------|-------------|-----------------------------|------------|---------------------------|--------|------|---------------------------------|-------------|
|       |             | B                           | Std. Error | Beta                      |        |      | Lower Bound                     | Upper Bound |
| 1     | (Constant)  | 4.554                       | 4.308      |                           | 1.057  | .326 | -5.632                          | 14.740      |
|       | 1990-94     | .357                        | 6.442      | .034                      | .055   | .957 | -14.877                         | 15.590      |
|       | 1995-99     | 5.904                       | 4.885      | .486                      | 1.209  | .266 | -5.647                          | 17.454      |
|       | 2000-05     | 7.216                       | 4.159      | .680                      | 1.735  | .126 | -2.618                          | 17.051      |
|       | 2006-17     | 8.556                       | 3.823      | .892                      | 2.238  | .060 | -.484                           | 17.595      |
|       | Age70       | 11.849                      | 4.805      | 1.065                     | 2.466  | .043 | .487                            | 23.211      |
|       | Europe      | -3.303                      | 3.948      | -.379                     | -.837  | .430 | -12.639                         | 6.032       |
|       | Black       | -9.055                      | 5.719      | -.549                     | -1.583 | .157 | -22.577                         | 4.468       |
|       | Multiracial | -3.314                      | 6.504      | -.343                     | -.510  | .626 | -18.693                         | 12.065      |

a. Dependent Variable: AFrate\_percentage

b. Weighted Least Squares Regression - Weighted by invariance



**Figure I. Projected number of adults individuals with AF in US by 2050 and European Union by 2060, assuming stable age-adjusted incidence rates**

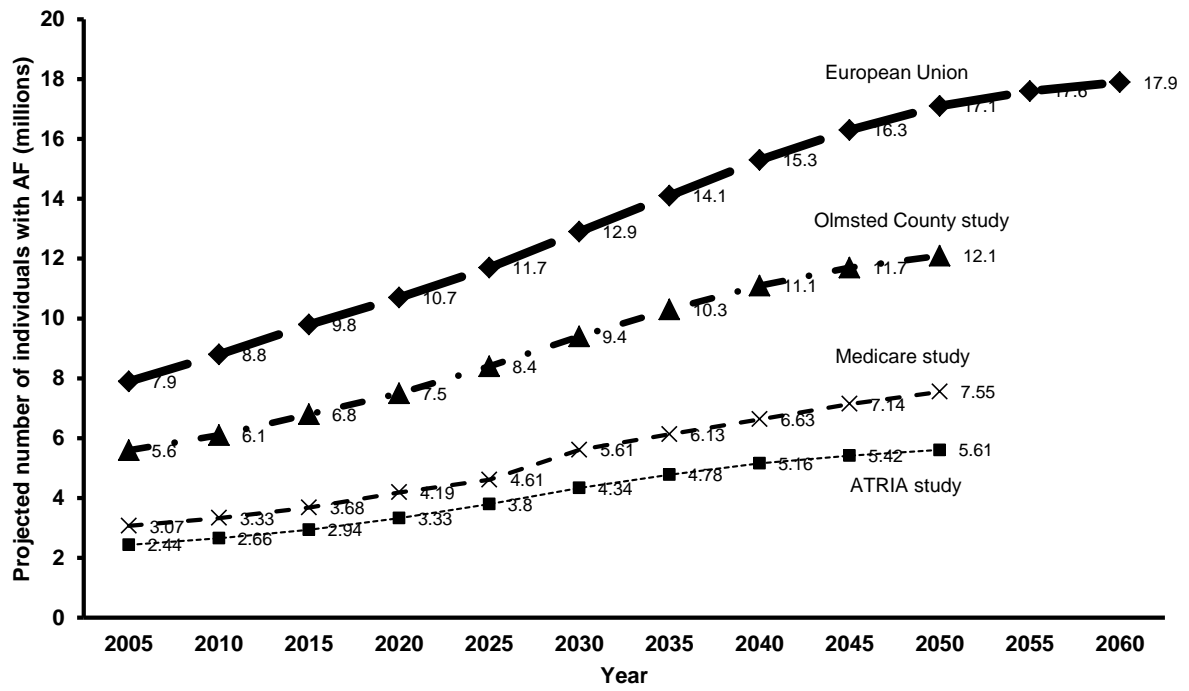

Data derived from ATRIA,<sup>35</sup> Olmsted County,<sup>36</sup> Medicare,<sup>37</sup> and European Union studies<sup>38</sup>

Figure II. Flow chart showing selection of studies for systematic review.

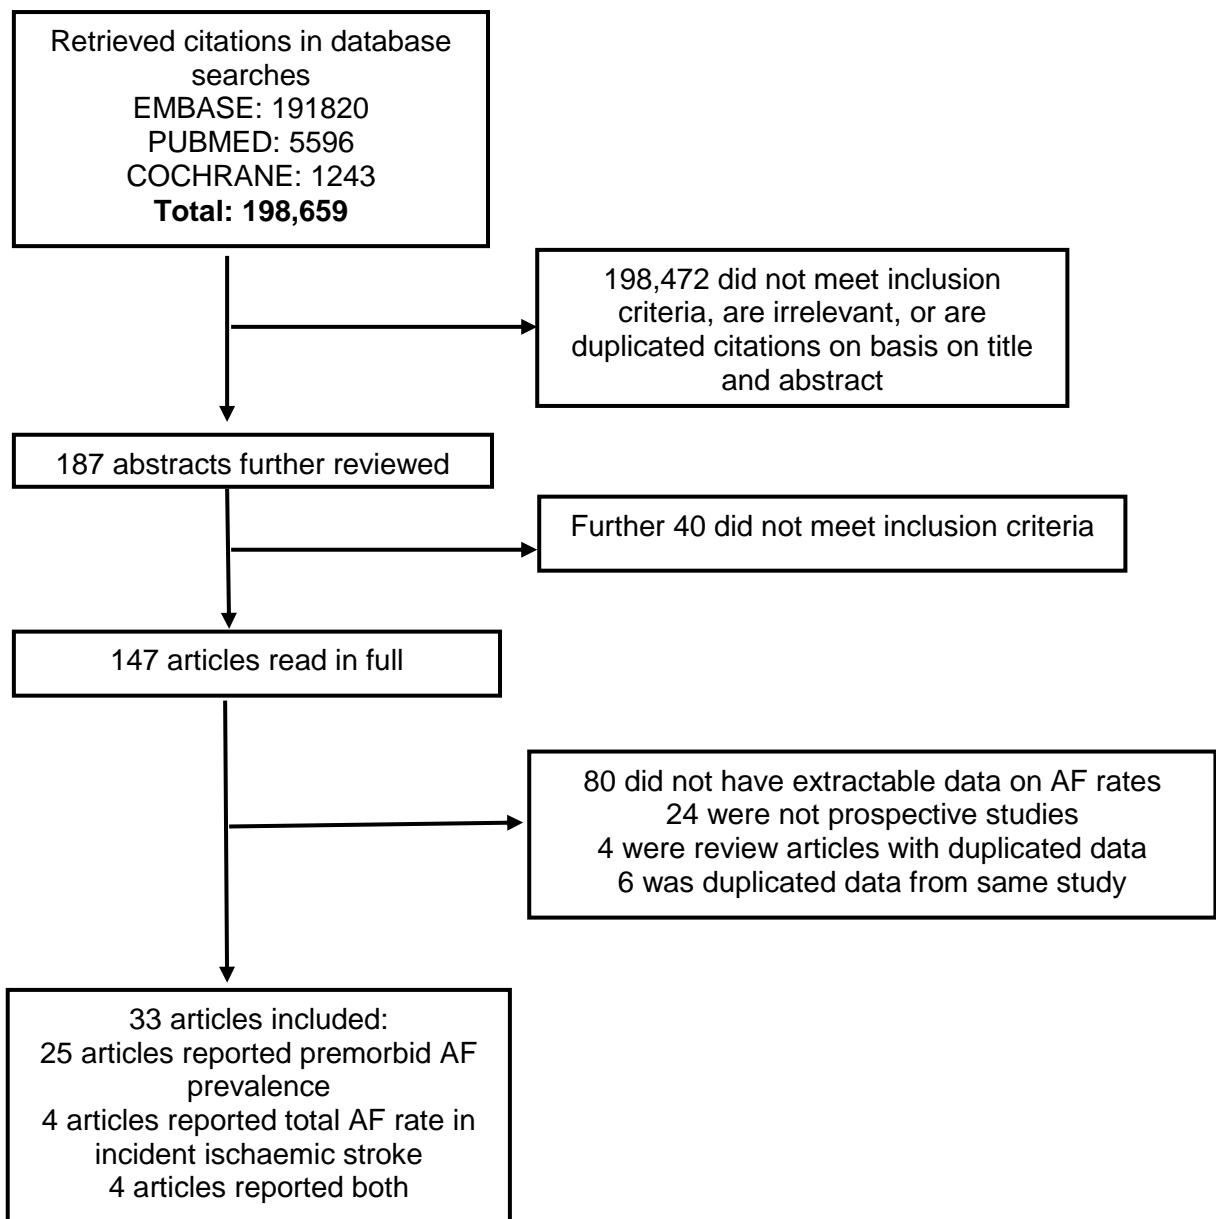

Figure III. Funnel plot of 44 AF rates from 33 reports; SE=standard error

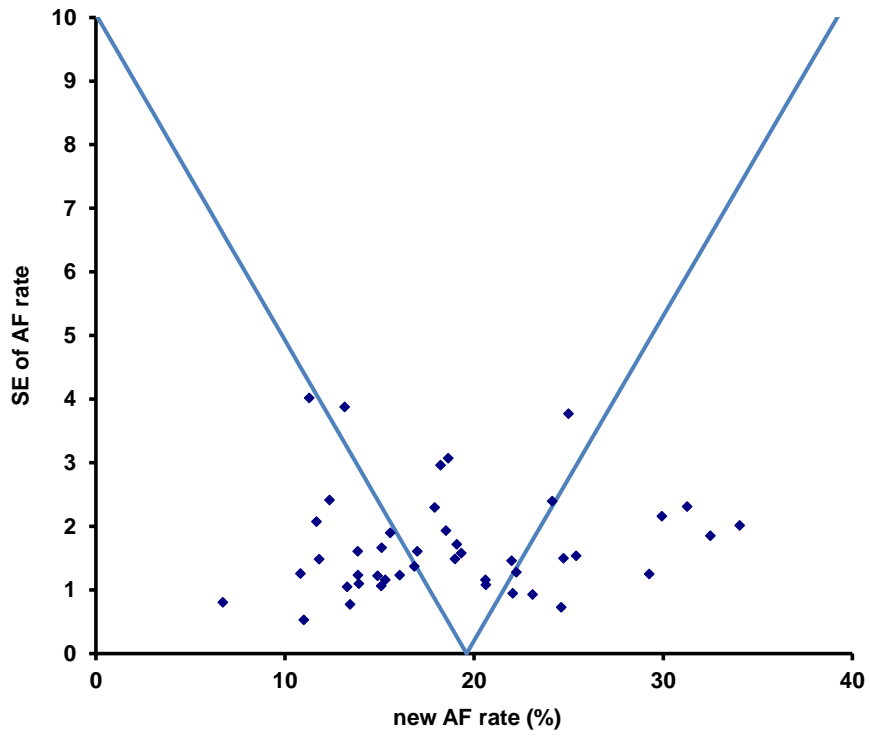

**Figure IVa-c. Forest plot of premorbid AF rates in European and non-European studies**

**(a) Eastern Europe**

| Period/Study               | PreAF<br>Total stroke | % PreAF     | 95% CI           |
|----------------------------|-----------------------|-------------|------------------|
| 1991-3 Tartu, Estonia      | 205 / 829             | 24.7        | 21.8-27.7        |
| 1992-3 Novosibirsk, Russia | 57 / 366              | 15.6        | 11.9-19.3        |
| 2001-3 Grodno, Belarus     | 478 / 2069            | 23.1        | 21.3-24.9        |
| 2001-3 Tartu, Estonia      | 135 / 451             | 29.9        | 25.7-34.2        |
| 2004-5 Kaunas, Lithuania   | 204 / 803             | 25.4        | 22.4-28.4        |
| 2005 Warsaw, Poland        | 33 / 132              | 25.0        | 17.6-32.4        |
| 2007-9 Varaždin, Croatia*  | 126 / 748             | 16.8        | 14.2-19.5        |
| <b>TOTAL</b>               | <b>1238 / 5398</b>    | <b>22.9</b> | <b>19.9-26.0</b> |

**Heterogeneity** **p < 0.0001**

**67.1% of the heterogeneity can be accounted for by age of stroke population >70 years, study period (main determinant at 52.3%), and ethnicity of population**

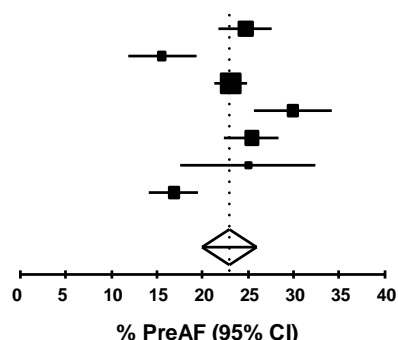

**(b) Western Europe**

| Period/Study                    | PreAF<br>Total stroke | % PreAF     | 95% CI           |
|---------------------------------|-----------------------|-------------|------------------|
| 1981-6 Oxfordshire, UK*         | 56 / 474              | 11.8        | 8.9-14.7         |
| 1985-91 Dijon, France*          | 143 / 890             | 16.1        | 13.7-18.5        |
| 1989-90 Malmo, Sweden           | 100 / 524             | 19.1        | 15.7-22.4        |
| 1989-90 Valley of Aosta, Italy* | 31 / 170              | 18.2        | 12.4-24.0        |
| 1989-90 Valley of Aosta, Italy* | 235 / 1057            | 22.2        | 19.7-24.7        |
| 1992-3 Belluno, Italy*          | 77 / 319              | 24.1        | 19.4-28.8        |
| 1993-5 Arcardia, Greece         | 189 / 555             | 34.1        | 30.1-38.0        |
| 1995-8 South London, UK         | 252 / 1223            | 20.6        | 18.3-22.9        |
| 1992-9 Dijon, France*           | 171 / 1133            | 15.1        | 13.0-17.2        |
| 1999-2002 South London, UK      | 138 / 992             | 13.9        | 11.8-16.1        |
| 1998-2000 N.Portugal            | 64 / 462              | 13.9        | 10.7-17.0        |
| 2003-6 South London, UK         | 148 / 967             | 15.3        | 13.0-17.6        |
| 1999-2002 Aeolian Island        | 7 / 62                | 11.3        | 3.4-19.2         |
| 2007-10 South London, UK        | 127 / 852             | 14.9        | 12.5-17.3        |
| 2000-6 Dijon, France*           | 139 / 1046            | 13.3        | 11.2-15.3        |
| 2004-6 Menorca, Spain           | 10 / 76               | 13.2        | 5.6-20.8         |
| 2004-6 Sesto Fiorentino, Italy  | 30 / 161              | 18.6        | 12.6-24.6        |
| 2007-9 Udine, Italy             | 208 / 640             | 32.5        | 28.9-36.1        |
| 2006-7 Ludwigshafen, Germany*   | 121 / 626             | 19.3        | 16.2-22.4        |
| 2009-11 N.Portugal              | 75 / 405              | 18.5        | 14.7-22.3        |
| 2007-8 Iceland                  | 50 / 279              | 17.9        | 13.4-22.4        |
| 2002-2017 Oxfordshire, UK*      | 425 / 1928            | 22.0        | 20.2-23.9        |
| <b>TOTAL</b>                    | <b>2796 / 14841</b>   | <b>18.8</b> | <b>16.5-21.1</b> |

**Heterogeneity** **p = 0.0000**

**76.5% of the heterogeneity can be accounted for by age of stroke population >70 years, study period (main determinant at 48.2%) and ethnicity of population**

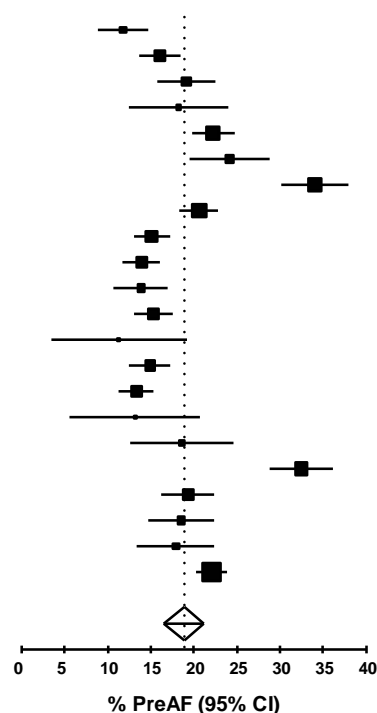

(c) Rest of the world

| Period/Study               | PreAF<br>Total stroke | % PreAF | 95% CI    |
|----------------------------|-----------------------|---------|-----------|
| 1960-9 Rochester, USA*     | 57 / 518              | 11.0    | 8.3-13.7  |
| 1970-9 Rochester, USA*     | 93 / 547              | 17.0    | 13.9-20.1 |
| 1980-9 Rochester, USA*     | 177 / 805             | 22.0    | 19.1-24.8 |
| 1993-4 GCNK, USA*          | 263 / 1956            | 13.4    | 11.9-15.0 |
| 1993-7 N.Manhattan, USA*   | 132 / 695             | 19.0    | 16.1-21.9 |
| 1998-9 French West Indies* | 70 / 463              | 15.1    | 11.9-18.4 |
| 2000-2 Iquique, Chile*     | 23 / 186              | 12.4    | 7.6-17.1  |
| 2001-05 Barbados           | 65 / 968              | 6.7     | 5.1-8.3   |
| 2002-3 Auckland, NZ        | 289 / 1401            | 20.6    | 18.5-22.7 |
| 2011-12 Auckland, NZ       | 389 / 1329            | 29.3    | 26.8-31.7 |
| 2003-4 French West Indies* | 28 / 240              | 11.7    | 7.6-15.7  |
| 2005-6 Joinville, Brazil*  | 66 / 610              | 10.8    | 8.4-13.3  |
| 2012-13 Joinville, Brazil* | 109 / 786             | 13.9    | 11.5-16.3 |
| TOTAL                      | 1761 / 10504          | 16.8    | 13.2-20.3 |

Heterogeneity

p < 0.0001

81.6% of the heterogeneity can be accounted for by age of stroke population >70 years, study period and ethnicity (main determinant at 45.1%) of population

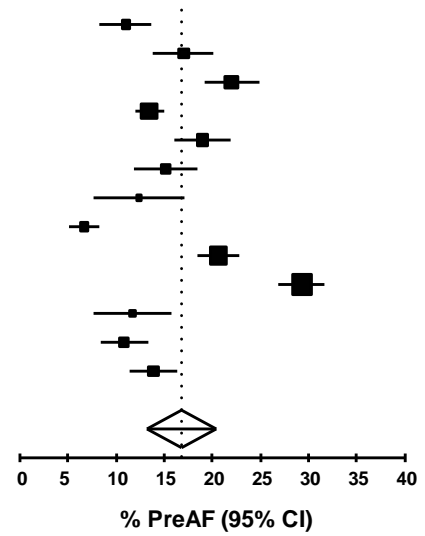

PreAF indicates premorbid AF

Figure V. Premorbid AF prevalence in population-based studies of incident ischaemic stroke\*

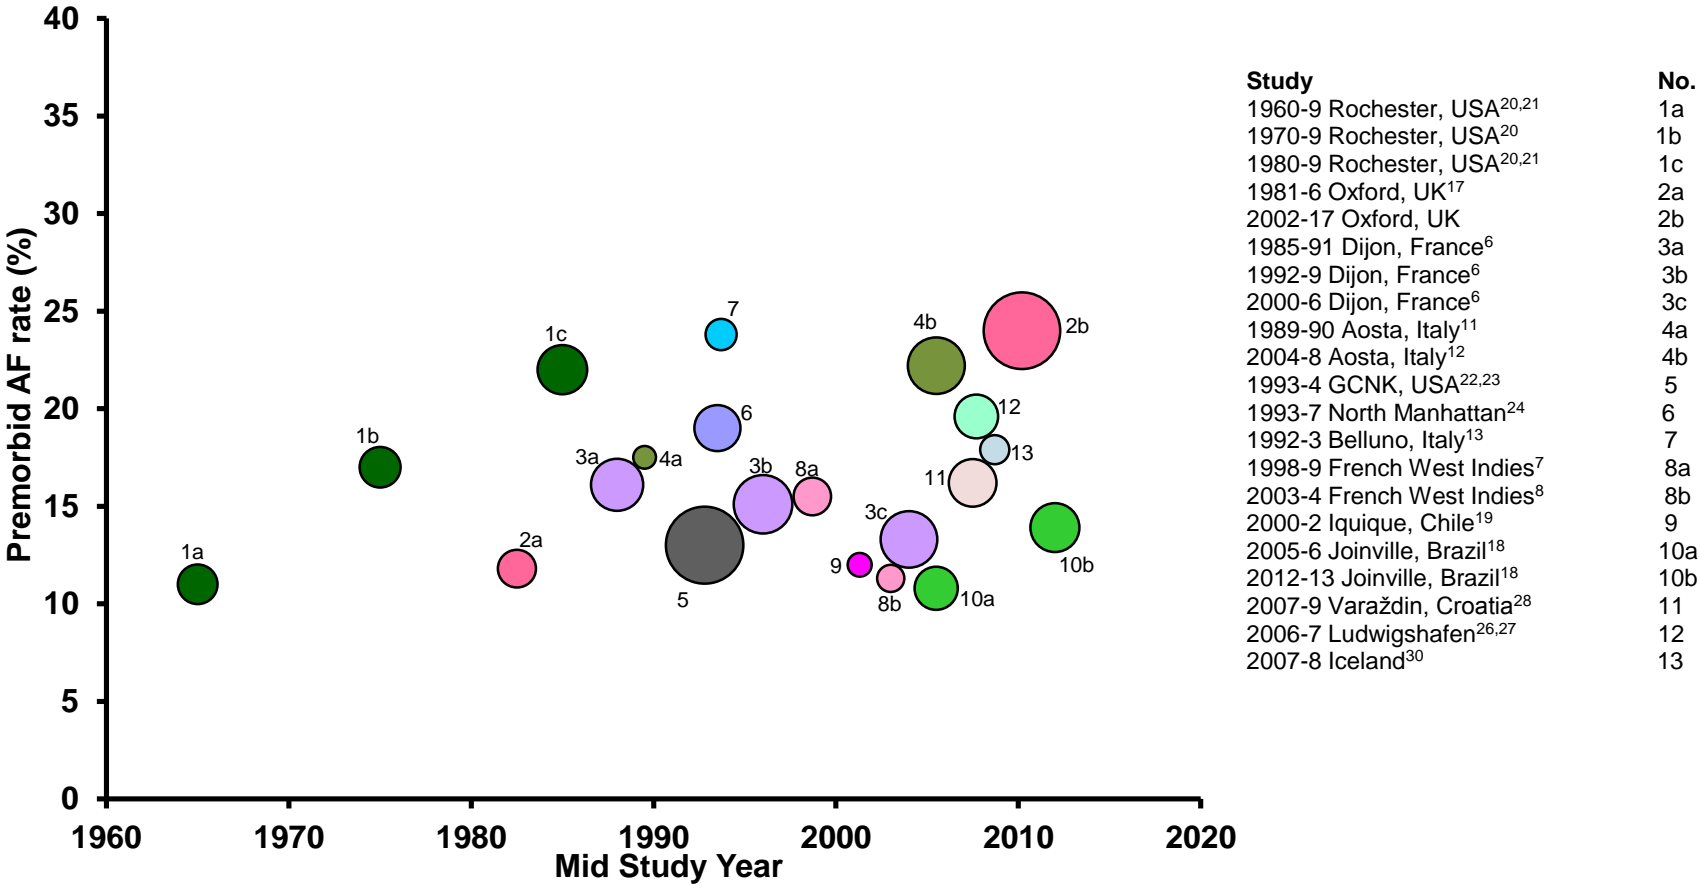

Overall heterogeneity  $p < 0.0001$ , of which 70.7% could be accounted for by age of stroke population >70years, study period (main determinant at 36.1%), country of origin and ethnicity of population - see Online-only data supplement Table IV.

**Figure VI. Forest plot of premorbid AF rates in studies with incident ischaemic stroke\* as denominator**

| Studies                         | PreAF               |             | 95% CI           |
|---------------------------------|---------------------|-------------|------------------|
|                                 | Total screened      | % PreAF     |                  |
| 1960-9 Rochester, USA*          | 57 / 518            | 11.0        | 8.3-13.7         |
| 1970-9 Rochester, USA*          | 93 / 547            | 17.0        | 13.9-20.1        |
| 1981-6 Oxford, UK*              | 56 / 474            | 11.8        | 8.9-14.7         |
| 1980-9 Rochester, USA*          | 177 / 805           | 22.0        | 19.1-24.8        |
| 1985-91 Dijon, France*          | 143 / 890           | 16.1        | 13.7-18.5        |
| 1989-90 Valley of Aosta, Italy* | 31 / 170            | 18.2        | 12.4-24.0        |
| 1992-3 Belluno, Italy*          | 77 / 319            | 24.1        | 19.4-28.8        |
| 1993-4 GCNK, USA*               | 263 / 1956          | 13.4        | 11.9-15.0        |
| 1993-7 N.Manhattan, USA*        | 132 / 695           | 19.0        | 16.1-21.9        |
| 1992-9 Dijon, France*           | 171 / 1133          | 15.1        | 13.0-17.2        |
| 1998-9 French West Indies*      | 70 / 463            | 15.1        | 11.9-18.4        |
| 2000-2 Iquique, Chile*          | 23 / 186            | 12.4        | 7.6-17.1         |
| 2003-4 French West Indies*      | 28 / 240            | 11.7        | 7.6-15.7         |
| 2000-6 Dijon, France*           | 139 / 1046          | 13.3        | 11.2-15.3        |
| 2005-6 Joinville, Brazil*       | 66 / 610            | 10.8        | 8.4-13.3         |
| 2006-7 Ludwigshafen, Germany*   | 121 / 626           | 19.3        | 16.2-22.4        |
| 2004-8 Valley of Aosta, Italy*  | 235 / 1057          | 22.2        | 19.7-24.7        |
| 2007-9 Varaždin, Croatia*       | 126 / 748           | 16.8        | 14.2-19.5        |
| 2007-8 Iceland*                 | 87 / 279            | 31.2        | 25.7-36.6        |
| 2012-13 Joinville, Brazil*      | 109 / 786           | 13.9        | 11.5-16.3        |
| 2002-17 Oxford, UK*             | 425 / 1928          | 22.0        | 20.2-23.9        |
| <b>TOTAL</b>                    | <b>2629 / 15476</b> | <b>17.0</b> | <b>15.1-18.9</b> |

**Heterogeneity**

**p < 0.0001**

**70.7% of the heterogeneity can be accounted for by age of stroke population >70 years, study period and ethnicity (main determinant at 25.5%) of population**

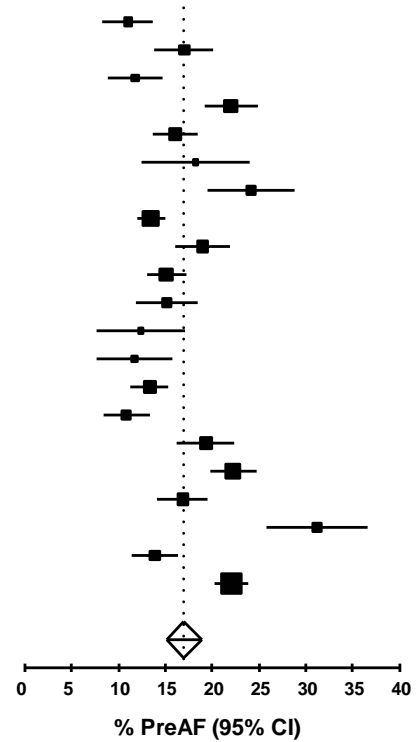

## Supplemental References

1. Korv J RM, Kaasik A-E. Stroke registry of Tartu, Estonia, from 1991 through 1993. *Cerebrovasc Dis*. 1997;7:154-162
2. Vibo R, Korv J, Roose M. The third stroke registry in Tartu, Estonia: Decline of stroke incidence and 28-day case-fatality rate since 1991. *Stroke*. 2005;36:2544-2548
3. Feigin VL, Wiebers DO, Nikitin YP, O'Fallon WM, Whisnant JP. Stroke epidemiology in Novosibirsk, Russia: A population-based study. *Mayo Clin Proc*. 1995;70:847-852
4. Heuschmann PU, Di Carlo A, Bejot Y, Rastenyte D, Ryglewicz D, Sarti C, et al. Incidence of stroke in Europe at the beginning of the 21st century. *Stroke*. 2009;40:1557-1563
5. Kulesh SD, Filina NA, Frantava NM, Zhytko NL, Kastsinevich TM, Kliatskova LA, et al. Incidence and case-fatality of stroke on the east border of the European Union: The Grodno stroke study. *Stroke*. 2010;41:2726-2730
6. Bejot Y, Ben Salem D, Osseby GV, Couvreur G, Durier J, Marie C, et al. Epidemiology of ischemic stroke from atrial fibrillation in Dijon, France, from 1985 to 2006. *Neurology*. 2009;72:346-353
7. Smadja D, Cabre P, May F, Fanon JL, Rene-Corail P, Riocreux C, et al. ERMANCIA: Epidemiology of stroke in Martinique, French West Indies: Part i: Methodology, incidence, and 30-day case fatality rate. *Stroke*. 2001;32:2741-2747
8. Chausson N, Olindo S, Cabre P, Saint-Vil M, Smadja D. Five-year outcome of a stroke cohort in Martinique, French West Indies: Etude Realisee en Martinique et Centree sur l'incidence des Accidents vasculaires cerebraux, part 2. *Stroke*. 2010;41:594-599
9. Smeeton NC, Corbin DO, Hennis AJ, Hambleton IR, Fraser HS, Wolfe CD, et al. Differences in risk factors between black caribbean patients with stroke in Barbados and South London. *Stroke*. 2009;40:640-643
10. Jerntorp P, Berglund G. Stroke registry in Malmo, Sweden. *Stroke*. 1992;23:357-361
11. D'Alessandro G, Di Giovanni M, Roveyaz L, Iannizzi L, Compagnoni MP, Blanc S, et al. Incidence and prognosis of stroke in the Valle D'Aosta, Italy. First-year results of a community-based study. *Stroke*. 1992;23:1712-1715
12. Corso G, Bottacchi E, Giardini G, Di Giovanni M, Meloni T, Campagnoni MP, et al. Epidemiology of stroke in northern Italy: The cerebrovascular Aosta registry, 2004-2008. *Neurological Sciences*. 2013;34:1071-1081
13. Lauria G, Gentile M, Fassetta G, Casetta I, Agnoli F, Andreotta G, et al. Incidence and prognosis of stroke in the Belluno province, Italy. First-year results of a community-based study. *Stroke*. 1995;26:1787-1793
14. Musolino R, La Spina P, Serra S, Postorino P, Calabro S, Savica R, et al. First-ever stroke incidence and 30-day case fatality in the Sicilian Aeolian archipelago, Italy. *Stroke*. 2005;36:2738-2741
15. Vemmos KN, Bots ML, Tsiouris PK, Zis VP, Grobbee DE, Stranjalis GS, et al. Stroke incidence and case fatality in southern Greece: The Arcadia stroke registry. *Stroke*. 1999;30:363-370
16. Marshall IJ, Wang YZ, McKeivitt C, Rudd AG, Wolfe CDA. Trends in risk factor prevalence and management before first stroke data from the South London Stroke Register 1995-2011. *Stroke*. 2013;44:1809-1816
17. Yiin GS, Howard DP, Paul NL, Li L, Luengo-Fernandez R, Bull LM, et al. Age-specific incidence, outcome, cost, and projected future burden of atrial fibrillation-related embolic vascular events: A population-based study. *Circulation*. 2014;130:1236-1244
18. Cabral NL, Cougo-Pinto PT, Magalhaes PSC, Longo AL, Moro CHC, Amaral CH, et al. Trends of stroke incidence from 1995 to 2013 in Joinville, Brazil. *Neuroepidemiology*. 2016;46:273-281
19. Lavados PM, Sacks C, Prina L, Escobar A, Tossi C, Araya F, et al. Incidence, 30-day case-fatality rate, and prognosis of stroke in Iquique, Chile: A 2-year community-based prospective study (PISCIS project). *Lancet*. 2005;365:2206-2215
20. Tsang TS, Petty GW, Barnes ME, O'Fallon WM, Bailey KR, Wiebers DO, et al. The prevalence of atrial fibrillation in incident stroke cases and matched population controls in Rochester, Minnesota: Changes over three decades. *J Am Coll Cardiol*. 2003;42:93-100
21. Brown RD, Whisnant JP, Sicks JD, O'Fallon WM, Wiebers DO. Stroke incidence, prevalence, and survival: Secular trends in Rochester, Minnesota, through 1989. *Stroke*. 1996;27:373-380
22. Schneider AT, Kissela B, Woo D, Kleindorfer D, Alwell K, Miller R, et al. Ischemic stroke subtypes: A population-based study of incidence rates among blacks and whites. *Stroke*. 2004;35:1552-1556



23. Kleindorfer DO, Khoury J, Moomaw CJ, Alwell K, Woo D, Flaherty ML, et al. Stroke incidence is decreasing in whites but not in blacks: A population-based estimate of temporal trends in stroke incidence from the Greater Cincinnati/Northern Kentucky stroke study. *Stroke*. 2010;41:1326-1331
24. White H, Boden-Albala B, Wang C, Elkind MS, Rundek T, Wright CB, et al. Ischemic stroke subtype incidence among whites, blacks, and hispanics: The Northern Manhattan study. *Circulation*. 2005;111:1327-1331
25. Krishnamurthi RV, Barker-Collo S, Parag V, Parmar P, Witt E, Jones A, et al. Stroke incidence by major pathological type and ischemic subtypes in the Auckland Regional Community Stroke Studies changes between 2002 and 2011. *Stroke*. 2018;49:3-10
26. Palm F, Kleemann T, Dos Santos M, Urbanek C, Buggle F, Safer A, et al. Stroke due to atrial fibrillation in a population-based stroke registry (Ludwigshafen Stroke Study) CHA(2) , DS(2) -VASc score, underuse of oral anticoagulation, and implications for preventive measures. *Eur J Neurol*. 2012;21:117-123
27. Palm F, Urbanek C, Wolf J, Buggle F, Kleemann T, Hennerici MG, et al. Etiology, risk factors and sex differences in ischemic stroke in the Ludwigshafen stroke study, a population-based stroke registry. *Cerebrovasc Dis*. 2012;33:69-75
28. Pikiija S, Cvetko D, Malojcic B, Trkanjec Z, Pavlicek I, Lukic A, et al. A population-based prospective 24-month study of stroke: Incidence and 30-day case-fatality rates of first-ever strokes in Croatia. *Neuroepidemiology*. 2012;38:164-171
29. Correia M, Magalhaes R, Felgueiras R, Quintas C, Guimaraes L, Silva MC. Changes in stroke incidence, outcome, and associated factors in Porto between 1998 and 2011. *International Journal of Stroke*. 2017;12:169-179
30. Hilmarsson A, Kjartansson O, Olafsson E. Incidence of first stroke: a population study in Iceland. *Stroke*. 2013;44:1714-1716
31. Marini C, De Santis F, Sacco S, Russo T, Olivieri L, Totaro R, et al. Contribution of atrial fibrillation to incidence and outcome of ischemic stroke: Results from a population-based study. *Stroke*. 2005;36:1115-1119
32. Hannon N, Sheehan O, Kelly L, Marnane M, Merwick A, Moore A, et al. Stroke associated with atrial fibrillation--incidence and early outcomes in the North Dublin population stroke study. *Cerebrovasc Dis*. 2010;29:43-49
33. Kelly PJ, Crispino G, Sheehan O, Kelly L, Marnane M, Merwick A, et al. Incidence, event rates, and early outcome of stroke in Dublin, Ireland the North Dublin population stroke study. *Stroke*. 2012;43:2042-2047
34. Janes F, Gigli GL, D'Anna L, Cancelli I, Perelli A, Canal G, et al. Stroke incidence and 30-day and six-month case fatality rates in Udine, Italy: A population-based prospective study. *International Journal of Stroke*. 2013;8:100-105
35. Go AS, Hylek EM, Phillips KA, Chang Y, Henault LE, Selby JV, et al. Prevalence of diagnosed atrial fibrillation in adults: national implications for rhythm management and stroke prevention: the AnTicoagulation and Risk Factors in Atrial Fibrillation (ATRIA) Study. *JAMA*. 2001;285:2370-2375
36. Miyasaka Y, Barnes ME, Gersh BJ, Cha SS, Bailey KR, Abhayaratna WP, et al. Secular trends in incidence of atrial fibrillation in Olmsted County, Minnesota, 1980 to 2000, and implications on the projections for future prevalence. *Circulation*. 2006;114:119-125
37. Naccarelli GV, Varker H, Lin J, Schulman KL. Increasing prevalence of atrial fibrillation and flutter in the United States. *Am J Cardiol*. 2009;104:1534-1539
38. Krijthe BP, Kunst A, Benjamin EJ, Lip GY, Franco OH, Hofman A, et al. Projections on the number of individuals with atrial fibrillation in the European Union, from 2000 to 2060. *European Heart J*. 2013;34:2746-2751
